# Supplementary material
Source: PubMed Central journal article supplement (PMC514116)

### Supplemental Figure 1. Schema for Arabidopsis MPSS database.

The database is designed with two major sets of tables, one that contains the genomic annotation and genomic signature information and a second that contains the MPSS expression data. These genomic and expression data are linked through the “tag\_master” table. The tables and fields are shown for each of the two major sets of tables. The lines connecting tables indicate one-to-one (simple lines) or one-to-many (branched lines) relationships.

#### Genomic data

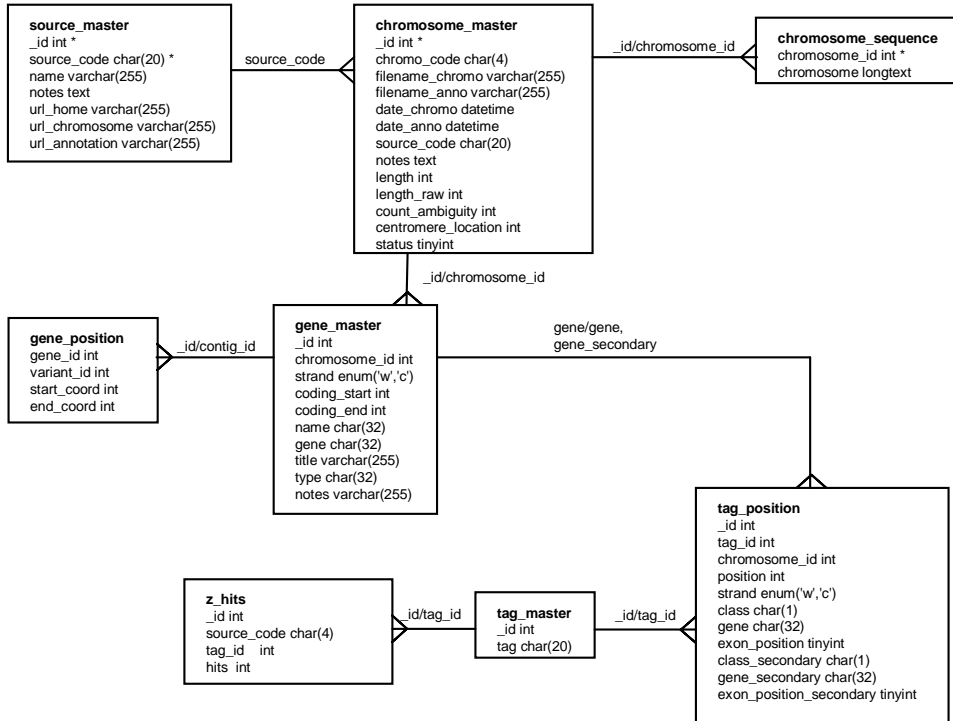

#### Expression data

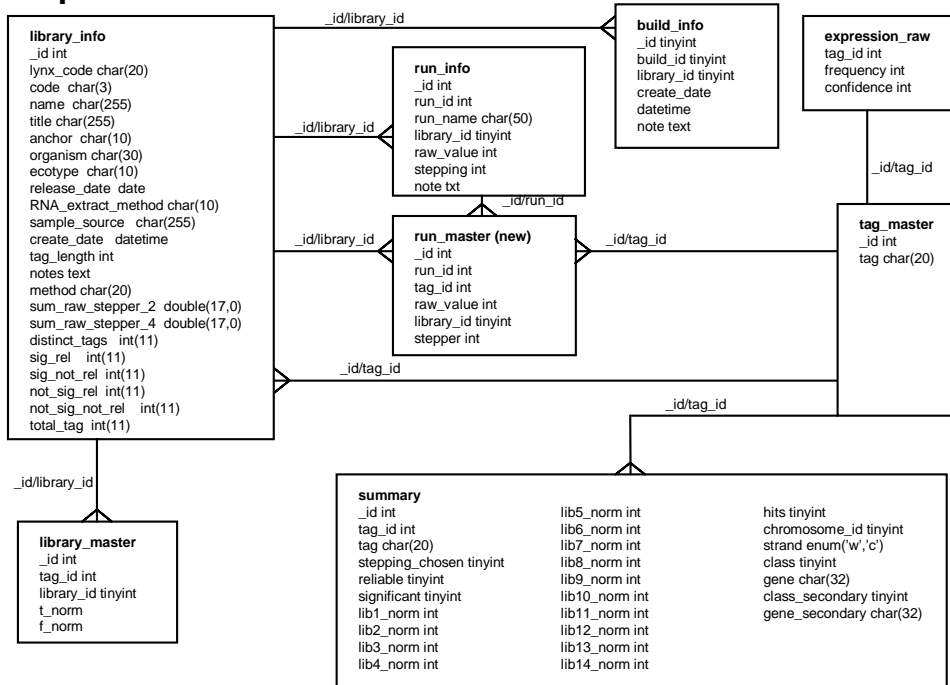

Supplement: plntphys_135_2_801__1.pdf [file plntphys_135_2_801__1.pdf]
